# Supplementary material for: Structural-Activity Relationship of Rare Ginsenosides from Red Ginseng in the Treatment of Alzheimer’s Disease
Source: MDPI journal article supplement (doi:10.3390/ijms24108625), 2023-05-11
Supplement: s1 [file s1]

# Supplementary Information

## Structure-activity relationship of rare ginsenosides in red ginseng and their mechanism of prevention and treatment of Alzheimer's disease

Xianwen Ye <sup>1,2,3</sup>, Haixia Zhang <sup>1,2</sup>, Qian Li <sup>1,2</sup>, Hongmin Ren <sup>1,2</sup>, Xinfang Xu <sup>1,2,3,\*</sup> and Xiangri Li <sup>1,2,3,\*</sup>

1 Centre of TCM Processing Research, Beijing University of Chinese Medicine, Beijing 102488, China; 20210941399@bucm.edu.cn (X.Y.); 20220935103@bucm.edu.cn (H.Z.); 20220935102@bucm.edu.cn (Q.L.); renhongmin0607@bucm.edu.cn (H.R.)

2 Beijing Key Laboratory for Quality Evaluation of Chinese Materia Medica, Beijing University of Chinese Medicine, Beijing 102488, China

3 Institute of Regulatory Science for Traditional Chinese Medicine, Beijing University of Chinese Medicine, Beijing 102488, China

\* Correspondence: lixiangri@sina.com (X.L.); 202102008@bucm.edu.cn (X.X.)

**Table S1.** Docking results and hydrogen bond related information between ginsenosides and inflammation factors

|               | PDB ID | Ligand        | Libscore | Affinity kcal/mol | Ligand atom | Amino acid residue atom | Bond length (Å) | Bond angle (°) |
|---------------|--------|---------------|----------|-------------------|-------------|-------------------------|-----------------|----------------|
| iNOS          | 4NOS   | <i>R</i> -Rh1 | 85.667   | -10.0             | O26         | LYS445:HZ1              | 2.54            | 134.41, 96.96  |
|               |        |               | 87.771   | -10.2             | O30         | LYS405:HZ3              | 2.09            | 153.08, 102.20 |
|               |        |               |          |                   | H103        | HIS424:O                | 2.81            | 90.50, 138.43  |
|               |        |               |          |                   | H107        | ILE423:O                | 2.43            | 126.92, 101.07 |
|               |        | <i>R</i> -Rg3 | 93.512   | -8.9              | H84         | HIS404:O                | 2.03            | 174.09, 162.85 |
|               |        |               |          |                   | H85         | HIS404:O                | 2.12            | 123.82, 121.01 |
|               |        | <i>S</i> -Rg3 | 118.709  | -8.4              | H84         | ILE433:O                | 2.23            | 107.17, 156.89 |
|               |        |               |          |                   | H88         | ILE433:O                | 2.39            | 97.12, 117.52  |
|               |        |               |          |                   | H107        | HIS424:O                | 2.23            | 95.69, 141.62  |
|               |        |               |          |                   |             |                         |                 |                |
| IL-6          | 1ALU   | <i>R</i> -Rh1 | 101.241  | -6.0              | H104        | THR43:OG1               | 1.52            | 142.82, 116.72 |
|               |        |               |          |                   | H107        | ARG104:O                | 2.24            | 112.77, 119.02 |
|               |        | <i>S</i> -Rh1 | 109.137  | -5.3              | H102        | GLN156:OE1              | 1.86            | 149.61, 112.09 |
|               |        |               |          |                   | H103        | GLN159:OE1              | 2.22            | 115.99, 90.68  |
|               |        |               |          |                   | H104        | GLN152:O                | 2.52            | 157.29, 169.59 |
|               |        |               |          |                   | H104        | GLN159:OE1              | 2.77            | 128.45, 156.72 |
|               |        | <i>R</i> -Rg3 | 119.677  | -6.0              | H107        | ARG104:O                | 2.58            | 121.43, 111.14 |
|               |        |               |          |                   | O45         | SER107:HN               | 2.93            | 131.03, 124.76 |
|               |        |               |          |                   | H100        | ARG104:O                | 2.35            | 94.33, 120.17  |
|               |        |               |          |                   | H108        | ARG104:O                | 2.92            | 136.68, 103.42 |
|               |        | <i>S</i> -Rg3 | 131.397  | -5.4              | H112        | ASP160:OD1              | 2.04            | 104.35, 136.91 |
|               |        |               |          |                   | O22         | GLN159:HE22             | 2.76            | 118.65, 99.81  |
|               |        |               |          |                   | H84         | GLN159:OE1              | 2.47            | 108.67, 114.54 |
|               |        |               |          |                   | H88         | GLN152:O                | 1.80            | 147.98, 156.12 |
| TNF- $\alpha$ | 2AZ5   | <i>R</i> -Rh1 | 95.795   | -8.4              | H97         | THR43:O                 | 2.91            | 132.60, 101.60 |
|               |        |               |          |                   |             |                         |                 |                |
|               |        |               |          |                   |             |                         |                 |                |
|               |        | <i>S</i> -Rh1 | 96.283   | -8.4              | H103        | LEU157:OXT              | 2.92            | 95.16, 142.23  |
|               |        |               |          |                   | H79         | LEU157:OXT              | 2.51            | 139.81, 146.59 |
|               |        |               |          |                   | H81         | LEU157:OXT              | 1.95            | 97.83, 143.40  |
|               |        | <i>R</i> -Rg3 | 140.434  | -8.5              | O45         | ASN39:HD22              | 2.44            | 121.67, 104.61 |
|               |        |               |          |                   | O47         | ASN39:HD22              | 2.69            | 153.00, 107.39 |
|               |        |               |          |                   | H97         | PRO12:O                 | 2.30            | 125.02, 109.72 |
|               |        |               |          |                   | H101        | ALA156:O                | 3.03            | 91.94, 138.03  |
|               |        |               |          |                   |             |                         |                 |                |



|           |      |     |         |       |      |             |      |         |
|-----------|------|-----|---------|-------|------|-------------|------|---------|
|           |      |     |         |       |      |             |      | 108.53  |
|           |      | Rk3 | 118.049 | -10.9 | H101 | SER423:O    | 2.1  | 171.07, |
|           |      |     |         |       |      |             |      | 127.99  |
|           |      | Rh4 | 114.324 | -11.4 | O39  | ARG354:HH12 | 3.03 | 94.32,  |
|           |      |     |         |       | O41  | ALA427:HN   | 2.81 | 118.86  |
|           |      |     |         |       | H101 | SER423:O    | 1.88 | 129.84, |
|           |      |     |         |       |      |             |      | 106.48  |
|           |      |     |         |       |      |             |      | 141.96, |
|           |      |     |         |       |      |             |      | 154.29  |
| Caspase-1 | 5MTK | Rk1 | 121.568 | -5.8  | O40  | HIS237:HD1  | 2.21 | 138.02, |
|           |      |     |         |       | H95  | GLY238:O    | 1.80 | 119.24  |
|           |      |     |         |       |      |             |      | 143.47, |
|           |      |     |         |       |      |             |      | 119.98  |
|           |      | Rg5 | 120.325 | -6.5  | O38  | HIS237:HD1  | 1.84 | 166.66, |
|           |      |     |         |       | H88  | GLY238:O    | 1.80 | 104.83  |
|           |      |     |         |       | H107 | GLY287:O    | 2.52 | 127.32, |
|           |      |     |         |       |      |             |      | 125.33  |
|           |      |     |         |       |      |             |      | 135.79, |
|           |      |     |         |       |      |             |      | 137.09  |
|           |      | Rk3 | 121.852 | -6.0  | H101 | ASP381:O    | 2.31 | 95.54,  |
|           |      |     |         |       | H101 | ARG383:O    | 1.91 | 138.28  |
|           |      |     |         |       |      |             |      | 132.23, |
|           |      |     |         |       |      |             |      | 129.73  |
|           |      | Rh4 | 100.136 | -6.7  | H66  | ASP288:OD1  | 2.74 | 134.80, |
|           |      |     |         |       | H100 | ARG178:O    | 2.34 | 151.40  |
|           |      |     |         |       |      |             |      | 100.97, |
|           |      |     |         |       |      |             |      | 153.33  |

## Metabolomics study of urine

### *QC sample preparation*

Take the same amount of urine from each mouse in the normal control group, model group, and drug administration group, mix it well, and prepare quality control samples according to the above procedure.

### *The chromatographic conditions*

Mobile phase: acetonitrile-0.1% formic acid (containing 10 mM ammonium acetate); Column temperature: 25°C; Flow rate: 0.6 mL/min; Column: Waters ACQUITY UPLC BEH C18 (2.1\*100mm, 1.7μm); Injection volume: 1μL, scanning range: 100-1500. As shown in **Table S3**.

**Table S3.** Gradient elution conditions of urine samples

| Time (min) | acetonitrile<br>(%) | 0.1% formic acid solution (containing<br>10mM ammonium acetate) |
|------------|---------------------|-----------------------------------------------------------------|
| 0          | 2                   | 98                                                              |
| 15         | 95                  | 5                                                               |
| 18         | 95                  | 5                                                               |
| 18.1       | 2                   | 98                                                              |
| 23         | 2                   | 98                                                              |

### ***Mass spectrometry conditions***

Matrix-assisted laser desorption ionization (MALDI): positive ion mode; Capillary voltage: 3kV, cone hole voltage: 40V; Desolvent temperature: 450°C; Ion source temperature: 120°C; Desolvent gas flow rate: 700L/h; Taper hole gas flow rate: 50L/h; The collection mass ranges from 100 AMU to 1500 AMU. Collision energy: low energy 4eV, high energy 15eV; Data acquisition mode: Centroid; Scan frequency: 30s; TOF operation mode: V mode. Reference solution: Leucine enkephalin (LE). Liquid data acquisition software MassLynx4.1.

Negative ion mode; Capillary voltage: 2kV, cone hole voltage: 40V; Desolvent temperature: 400°C; Ion source temperature: 120°C; Desolvent gas flow rate: 800L/h; Taper hole gas flow rate: 50L/h; The collection mass ranges from 100 AMU to 1500 AMU. Collision energy: low energy 4eV, high energy 15eV; Data acquisition mode: Centroid; Scan frequency: 30s; TOF operation mode: V mode. Reference solution:

Leucine enkephalin (LE). Liquid data acquisition software MassLynx4.1.

### ***Methodological investigation***

The instrument precision, method reproducibility, and system stability of the UPLC-MS method were investigated by the relative standard deviation (RSD) between the retention time (tR) of mass/charge ratio (m/z) and the ion peak intensity in QC samples.

Precision inspection of the instrument: the same QC sample was injected and analyzed three times in a row, and three identical m/z were selected from each analysis result to calculate the RSD value of tR and its peak intensity respectively, and the RSD value was required to be less than 10%.

Methods Reproducibility investigation: Three QC samples were prepared in parallel and analyzed by injection. Three identical m/z were selected from each analysis result, and the RSD values of tR and its peak intensity were calculated respectively, and the RSD values were required to be less than 15%.

System stability inspection: In the process of sample data collection, QC samples should be tested once for every 10 samples tested. After sample testing is completed, three QC results in the process are taken, three identical m/z are selected, and the RSD values of tR and its peak intensity are calculated respectively, and RSD values are required to be less than 20%.

### ***Liquid data processing***

Data processing is mainly carried out by the Masslynx workstation, where the MarkerLynxXS module can perform multivariate statistical analysis on liquid data. The structure of the composite can be further identified by scanning the ion fragments under the high-energy surface. The collected data of liquid is a 3D data point including retention time, M/Z, and intensity. This data point must be transformed into a

two-dimensional data point for subsequent multivariate statistical analysis. Data transformation can be done by the markerlynxXS module in Masslynx.

## Urine metabolomics results

### *Methodological investigation*

Three  $t_R$ - $m/z$  in positive ion mode (4.89\_379, 10.45\_302, 11.87\_330) and three  $t_R$ - $m/z$  in negative ion mode (2.54\_231, 4.94\_377, 5.70\_427) of urine QC samples were selected respectively.

The RSD of  $t_R$  and its ion peak area was calculated respectively to investigate the instrument precision, method reproducibility, and system stability of the UPLC-MS method. The specific results are shown in **Table S4**.

The results show that the precision, stability, and reproducibility of RSD of UPLC-MS retention time in positive ion mode were 0.07~0.09, 0.15~0.27, and 0.05~0.27, respectively, and the RSD values of the corresponding ion peak area were 2.53~9.85, 2.41~9.57, and 0.96~7.70; The precision, stability, and reproducibility of UPLC-MS retention time in negative ion mode were 0.27~1.14, 0.37~1.13 and 0.43~1.25, respectively, and the RSD values of corresponding ion peak area were 2.07~3.43, 0.77~9.39 and 4.08~12.52, respectively. The results show that the method is accurate, reliable, and can meet the requirements of metabonomics research.

**Table S4.** The results of UPLC-MS methodology investigation in urine metabonomics (*Mean, n=5*)

| $t_R$ - $m/z$            | Precision (RSD,%) |           | Stability (RSD,%) |           | Repeatability (RSD,%) |           |
|--------------------------|-------------------|-----------|-------------------|-----------|-----------------------|-----------|
|                          | $t_R$             | Peak area | $t_R$             | Peak area | $t_R$                 | Peak area |
| <b>Positive ion mode</b> |                   |           |                   |           |                       |           |
| 4.89-379                 | 0.09              | 2.53      | 0.27              | 3.09      | 0.27                  | 2.44      |

|                          |      |      |      |      |      |       |
|--------------------------|------|------|------|------|------|-------|
| 10.45-302                | 0.09 | 7.84 | 0.19 | 2.41 | 0.16 | 0.96  |
| 11.87-330                | 0.07 | 9.85 | 0.15 | 9.57 | 0.05 | 7.70  |
| <b>Negative ion mode</b> |      |      |      |      |      |       |
| 2.54-231                 | 1.14 | 3.43 | 0.95 | 5.47 | 0.95 | 4.08  |
| 4.94-377                 | 0.38 | 2.24 | 0.37 | 9.39 | 0.43 | 12.52 |
| 5.70-427                 | 0.27 | 2.07 | 1.03 | 0.77 | 1.25 | 1.83  |

---

### ***Total ion flow diagram analysis***

Liquid chromatography-mass spectrometry (LC-MS) is usually used for the analysis of metabonomic samples, and the full component analysis of complex samples is realized by positive and negative ion models. In this experiment, the total ion flow diagram of the urine sample in positive and negative ion modes is shown in **Figure S1** and **Figure S2**. As can be seen in **Figure S1**, the chemical composition of urine samples in positive ion mode is very complex and the chemical composition of each group of samples is similar, so it is difficult to distinguish from the total ion flow diagram. Compared with the model group, the total ion current diagram of 8-12 min in the control group was different from that in the model group, and it would change obviously after administration.



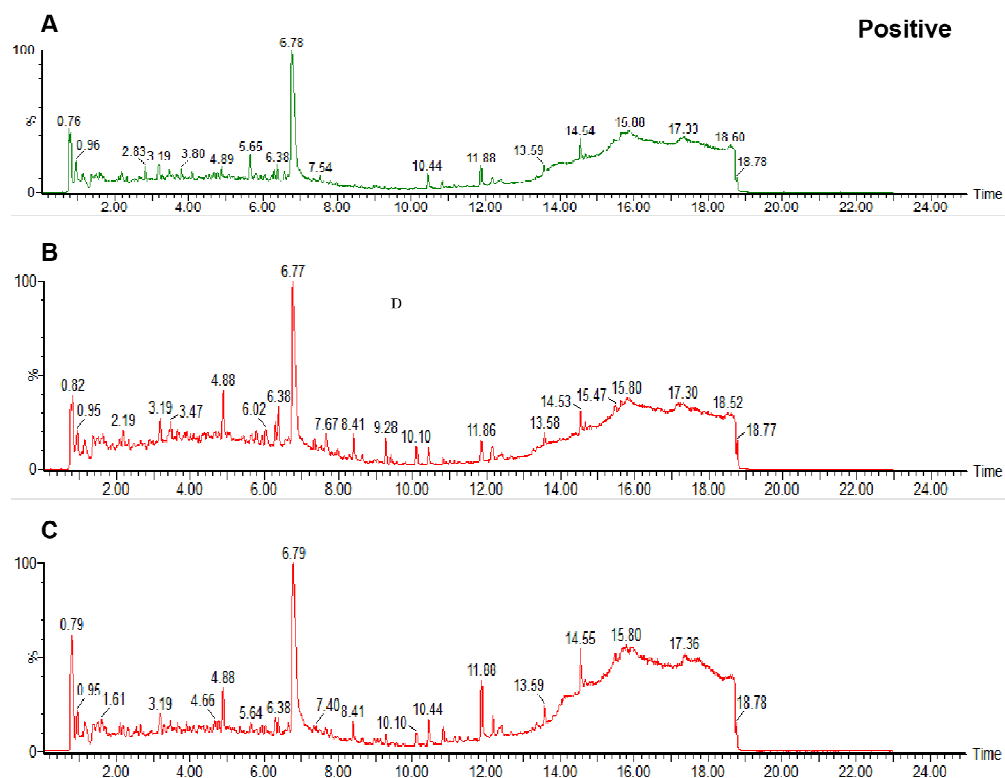

**Figure S1** The total ion flow diagram of urine sample in positive ion mode (A: Control; B: Model group; C:Rh4 group)

As can be seen in **Figure S2**, the chemical composition of urine samples in negative ion mode is very complex and the chemical composition of each group of samples is similar, so it is difficult to distinguish from the total ion flow diagram. The metabolites of urine are different in the positive ion mode and the negative ion mode. The sample has a uniform peak in the positive ion mode, and it is mainly a polar metabolite in the negative ion mode.

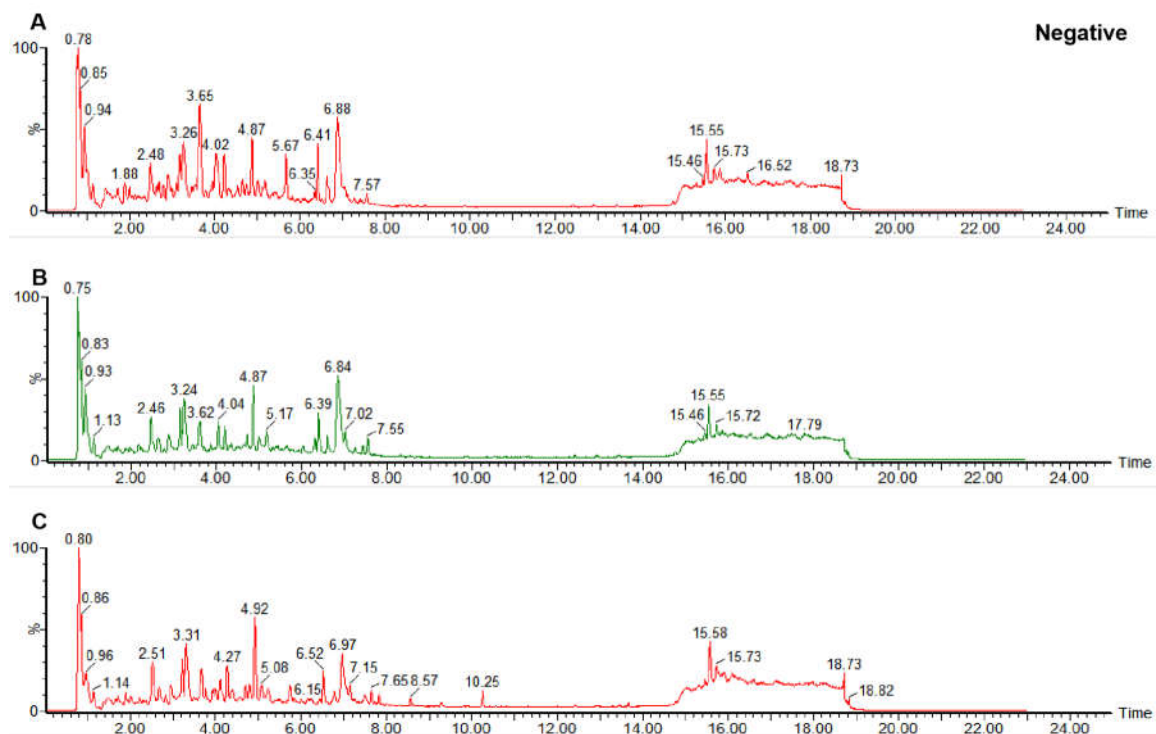

**Figure S2** The total ion flow diagram of urine sample in negative ion mode (A: Control; B: Model group; C:Rh4 group)
